# Supplementary material
Source: PubMed Central journal article supplement (PMC4836431)
Supplement: AEM.00247-16_zam999117107so1.pdf [file AEM.00247-16_zam999117107so1.pdf]

**Revised Supplemental Material**

**Regional Similarity and Consistent Patterns of Local Variation in Beach Sand Bacterial Communities throughout the Northern Hemisphere**

Christopher Staley and Michael J. Sadowsky\*

BioTechnology Institute, University of Minnesota, 1479 Gortner Ave., 140 Gortner Labs, St. Paul, MN 55108 USA

\*Correspondence: Michael J. Sadowsky, BioTechnology Institute, University of Minnesota, 140 Gortner Lab, 1479 Gortner Ave, Saint Paul, MN 55108; Phone: (612)-624-2706, Email: [sadowsky@umn.edu](mailto:sadowsky@umn.edu)

Running title: Characterization of bacteria in beach sands

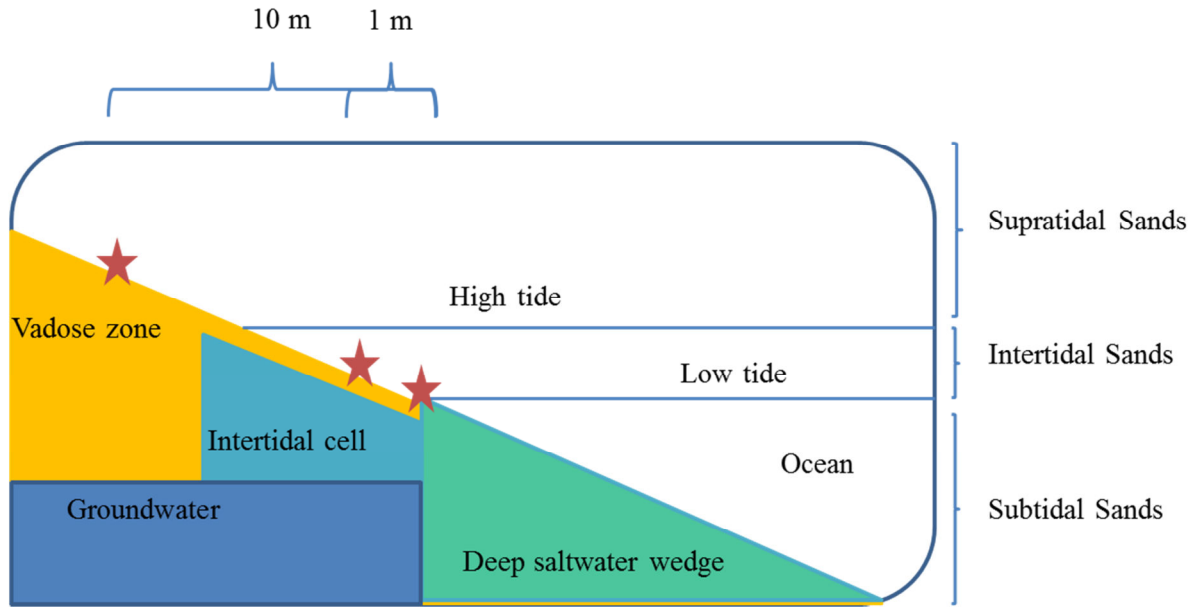

Figure S1. Diagram of beach features and sampling locations (stars).

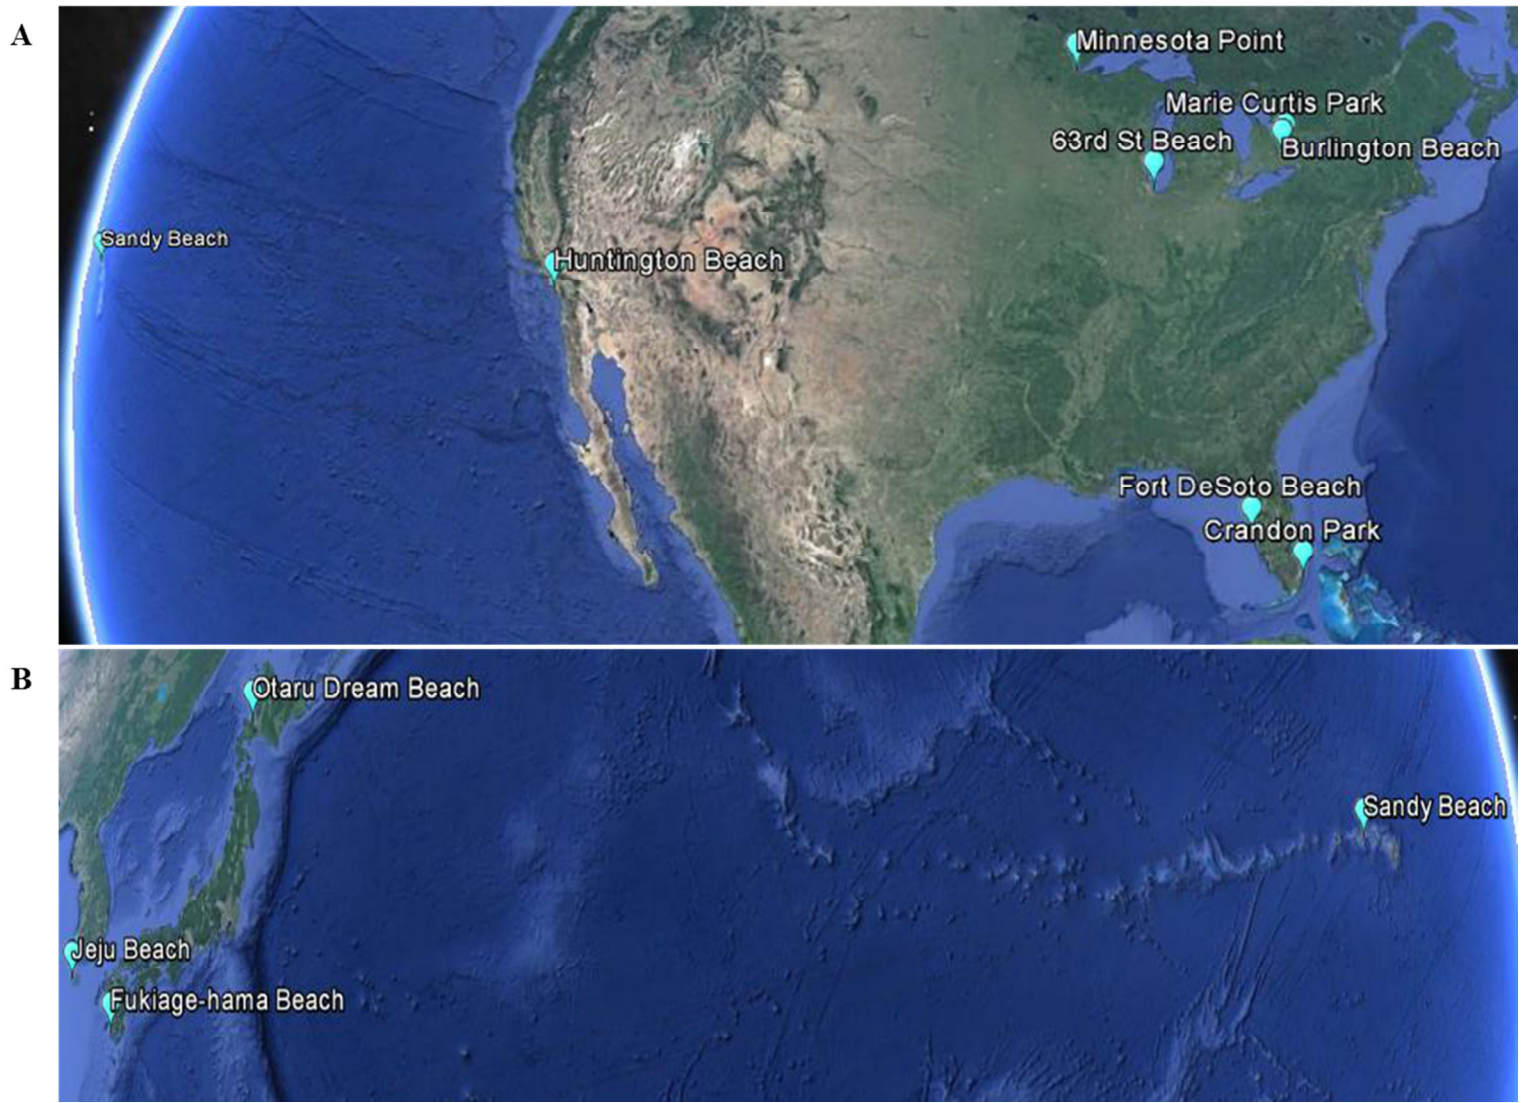

Figure S2 – Locations of beaches sampled (A) in the United States and (B) in the Pacific Ocean. This map was generated using Google Earth.

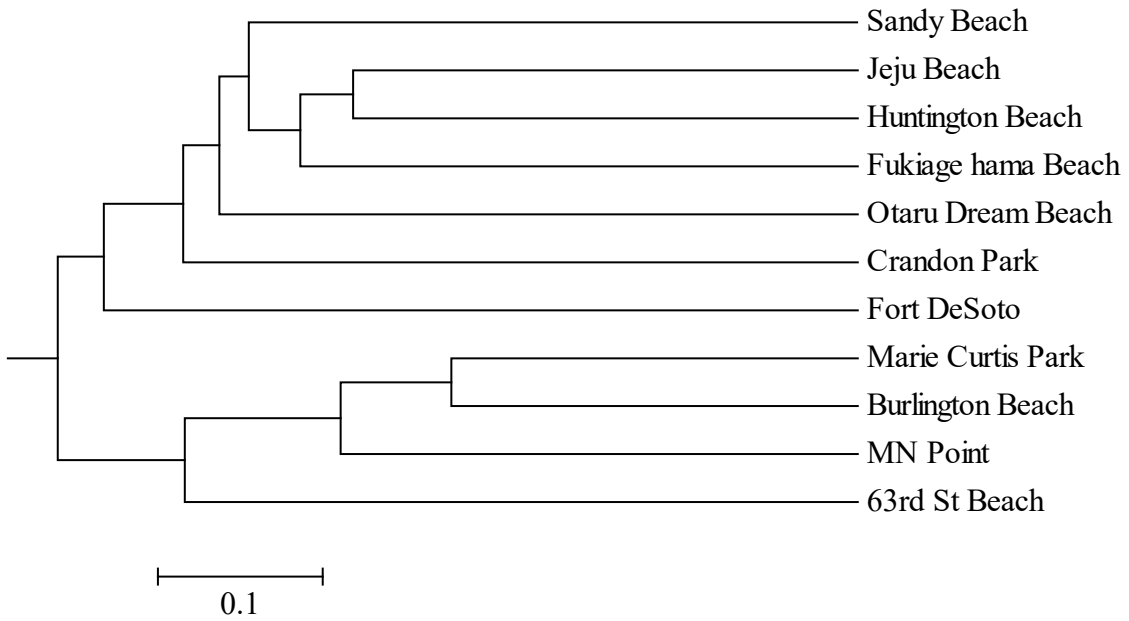

Figure S3. Phylogenetic tree of Bray-Curtis dissimilarities among sampling sites constructed using the unweighted pair group method with arithmetic mean.

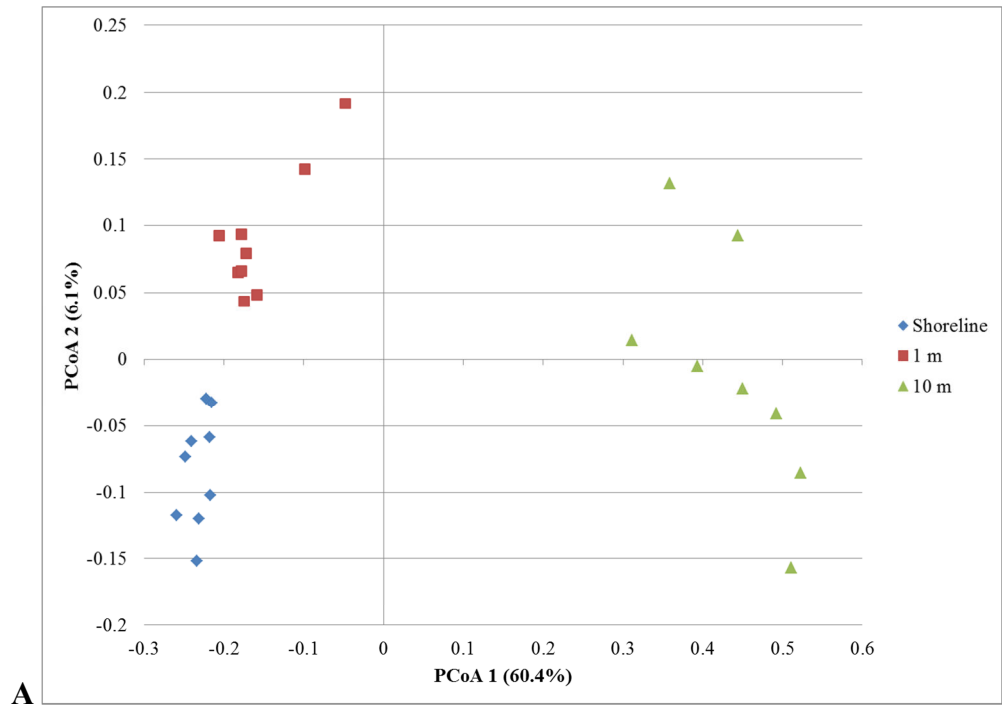

**A**

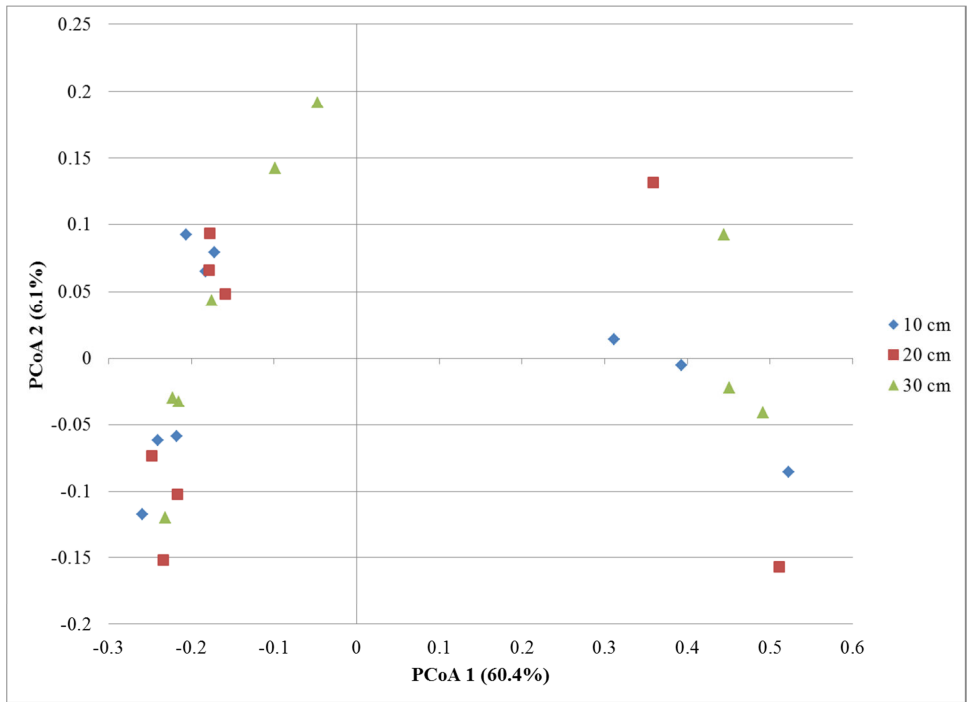

**B**

Figure S4 - Principal coordinate analysis of samples collected from MN Point by distance (A) and depth (B). The relationship between the ordination plot and distance matrix:  $r^2 = 0.96$ .

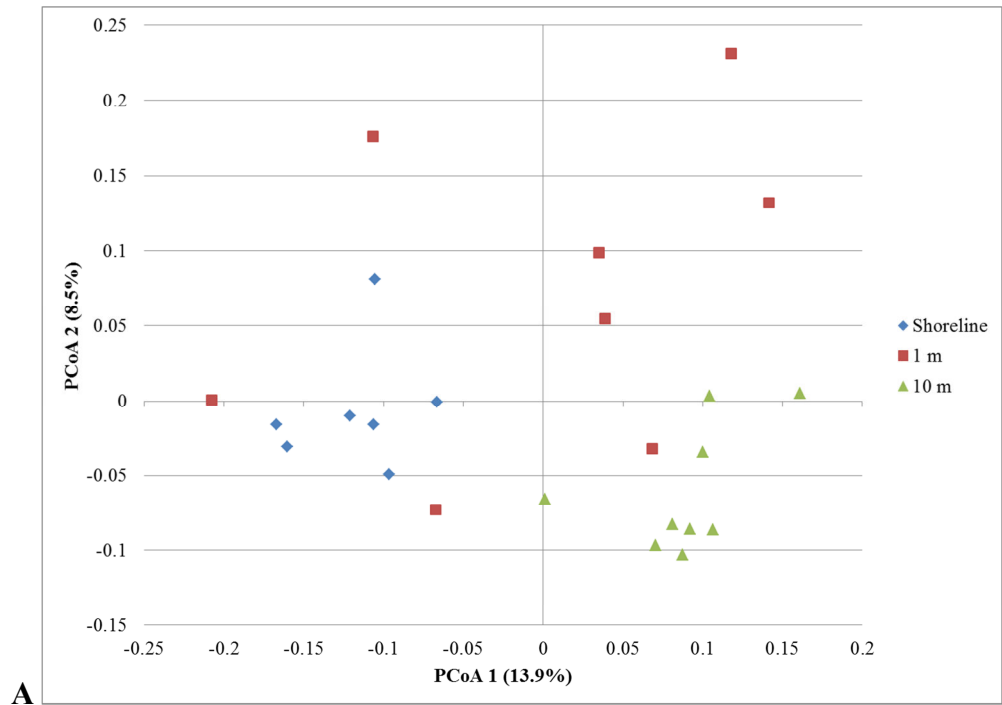

**A**

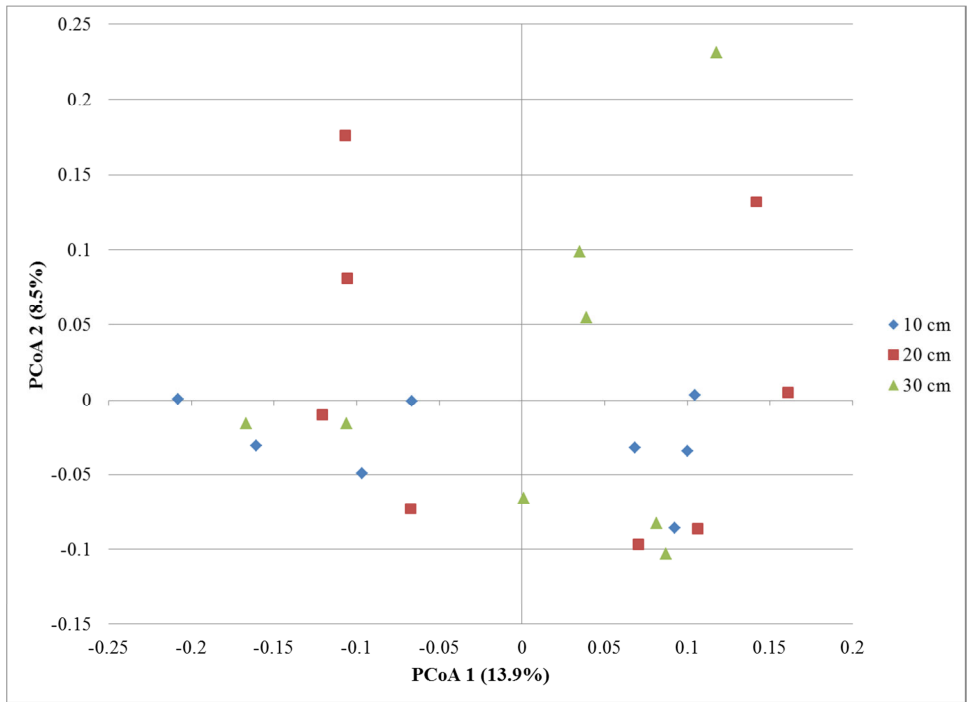

**B**

Figure S5 - Principal coordinate analysis of samples collected from Burlington Beach by distance (A) and depth (B). The relationship between the ordination plot and distance matrix:  $r^2 = 0.49$ .

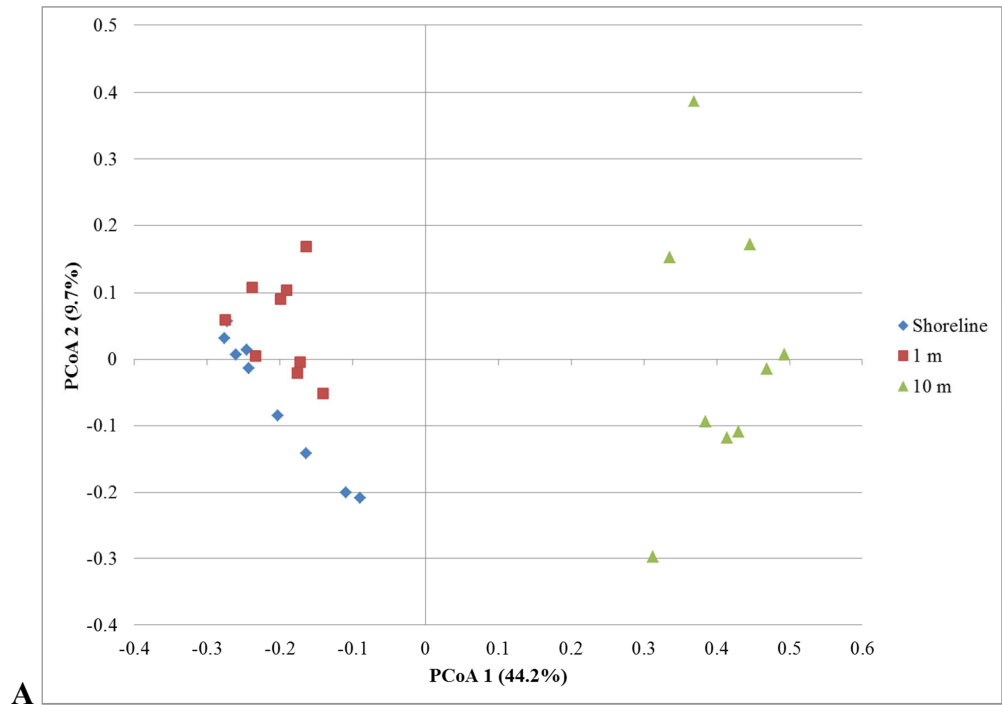

**A**

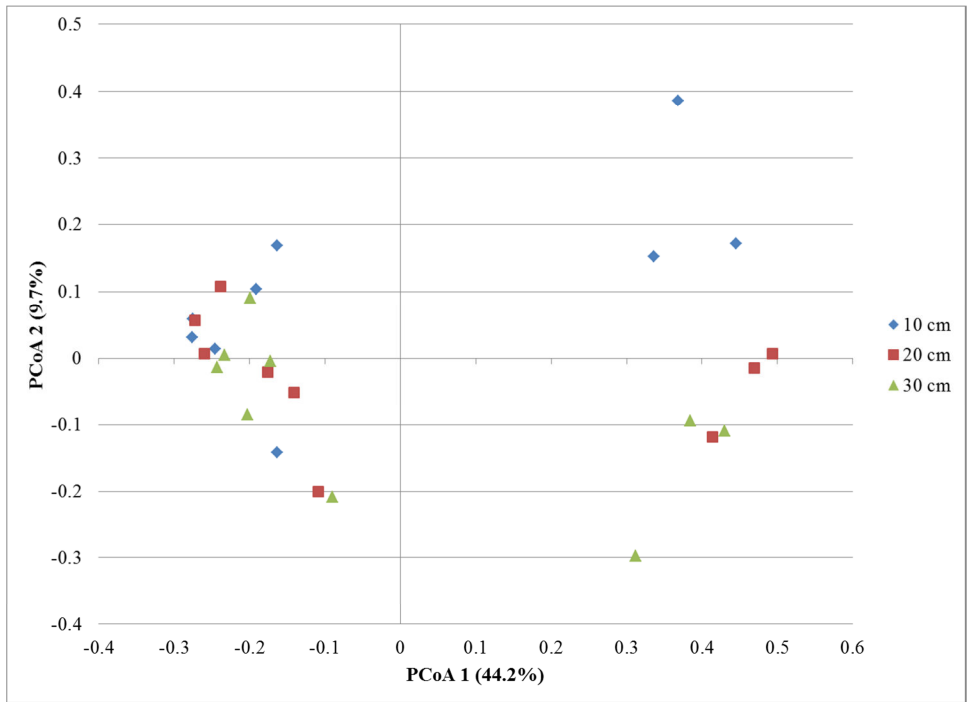

**B**

Figure S6 - Principal coordinate analysis of samples collected from Marie Curtis Park by distance (A) and depth (B). The relationship between the ordination plot and distance matrix:  $r^2 = 0.92$ .

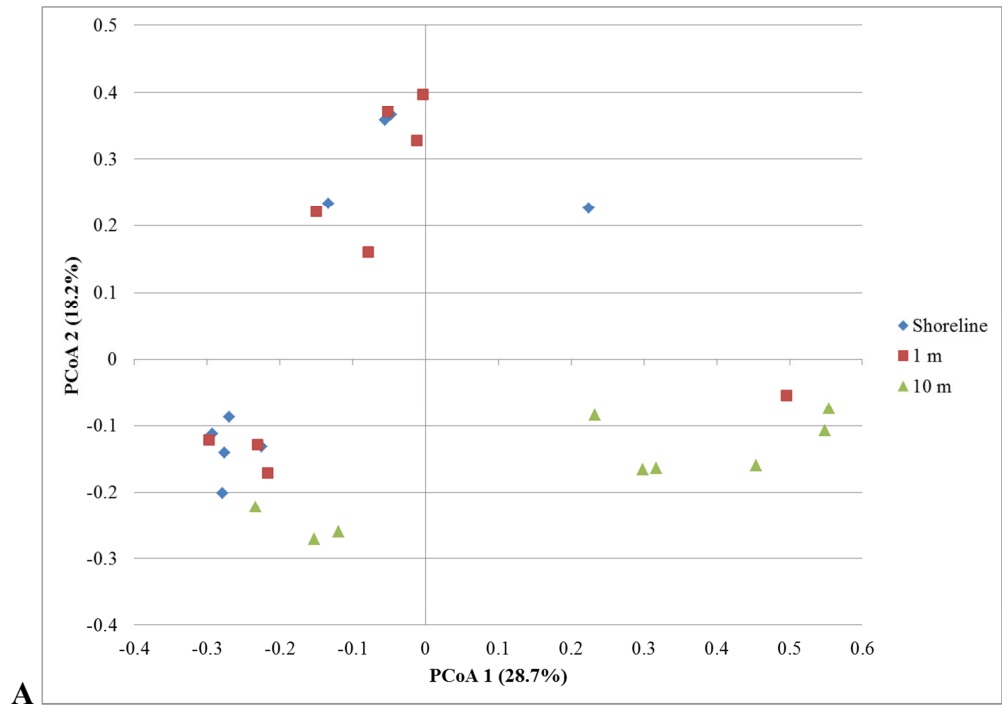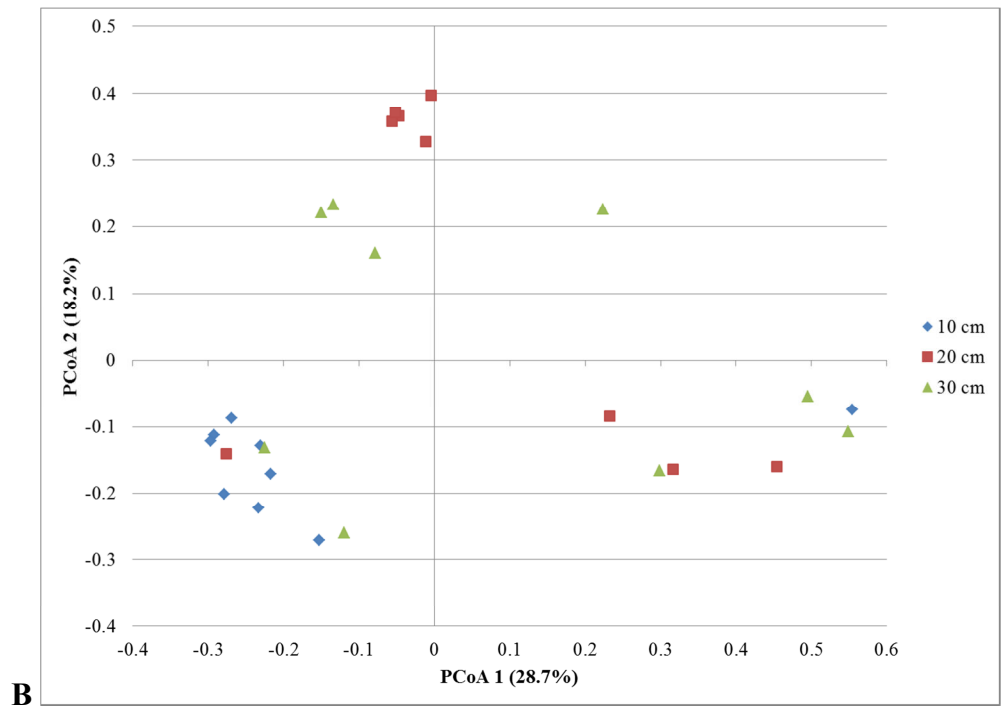

Figure S7 - Principal coordinate analysis of samples collected from Fort DeSoto by distance (A) and depth (B). The relationship between the ordination plot and distance matrix:  $r^2 = 0.78$ .



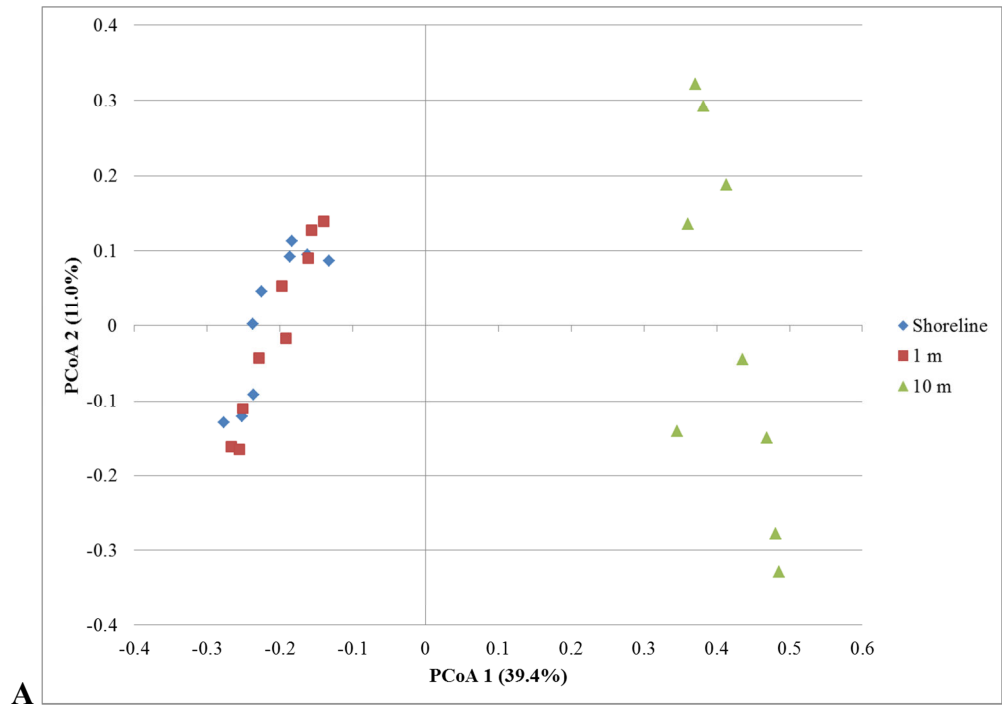

**A**

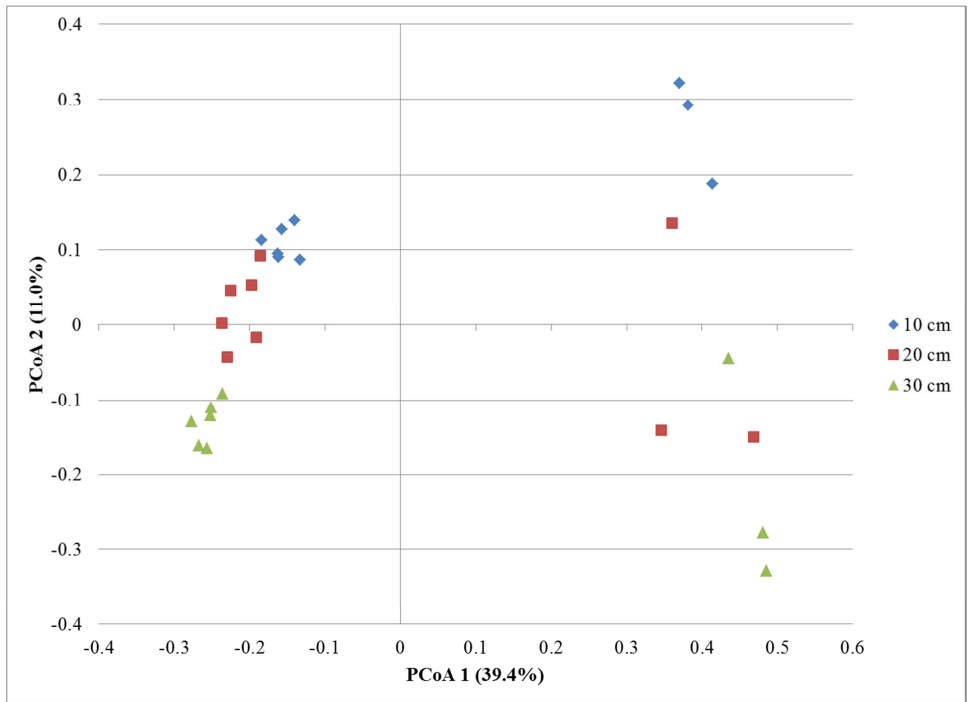

**B**

Figure S8 - Principal coordinate analysis of samples collected from Crandon Park by distance (A) and depth (B). The relationship between the ordination plot and distance matrix:  $r^2 = 0.93$ .

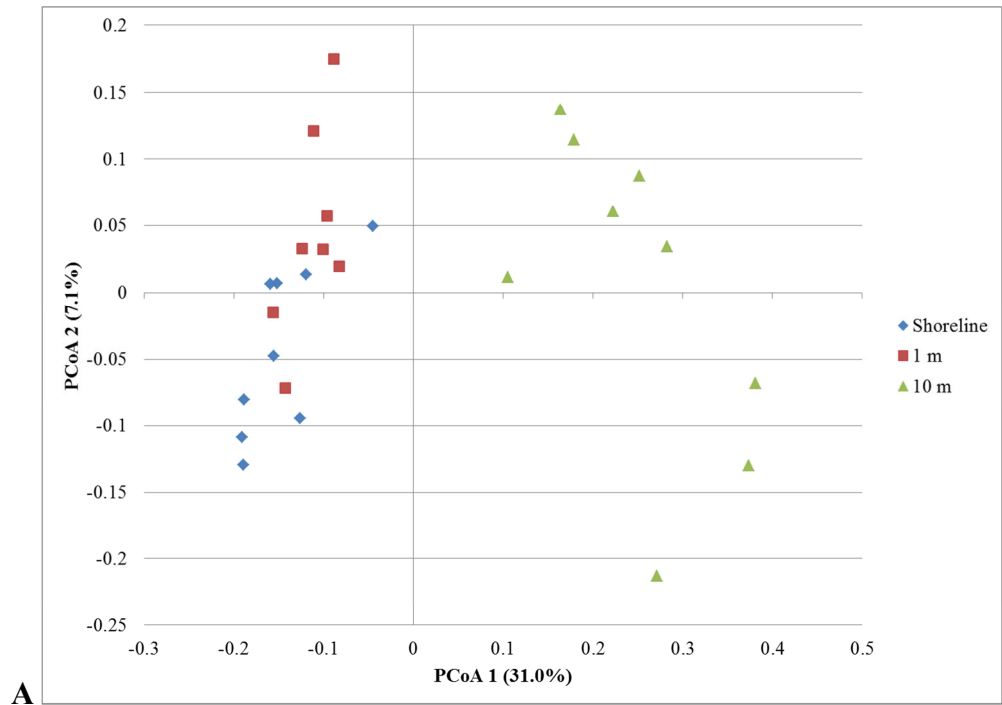

**A**

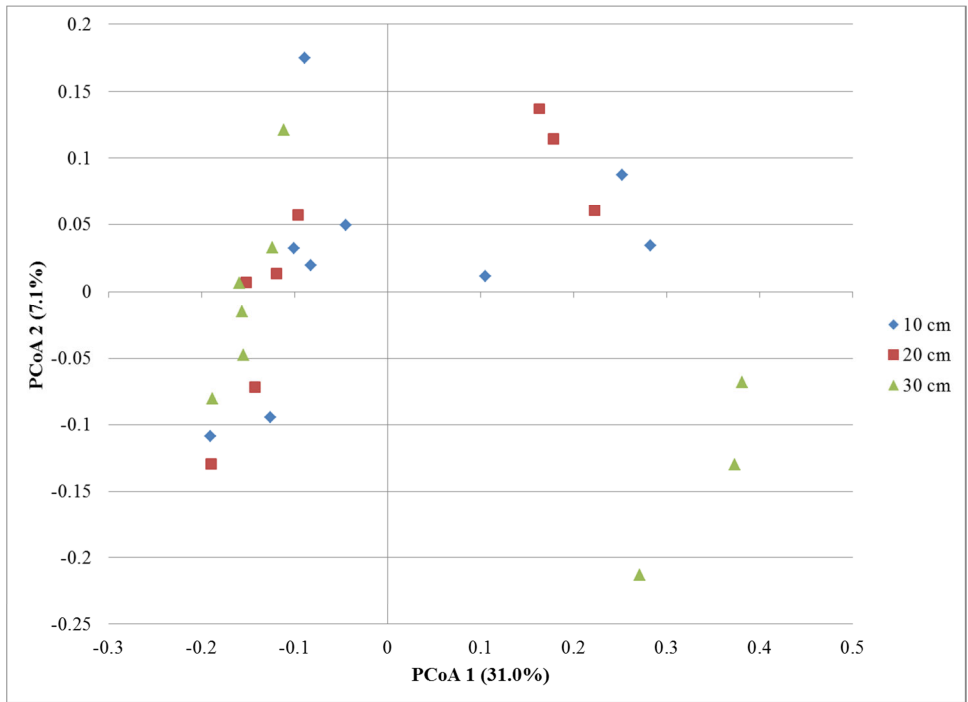

**B**

Figure S9 - Principal coordinate analysis of samples collected from Huntington Beach by distance (A) and depth (B). The relationship between the ordination plot and distance matrix:  $r^2 = 0.89$ .

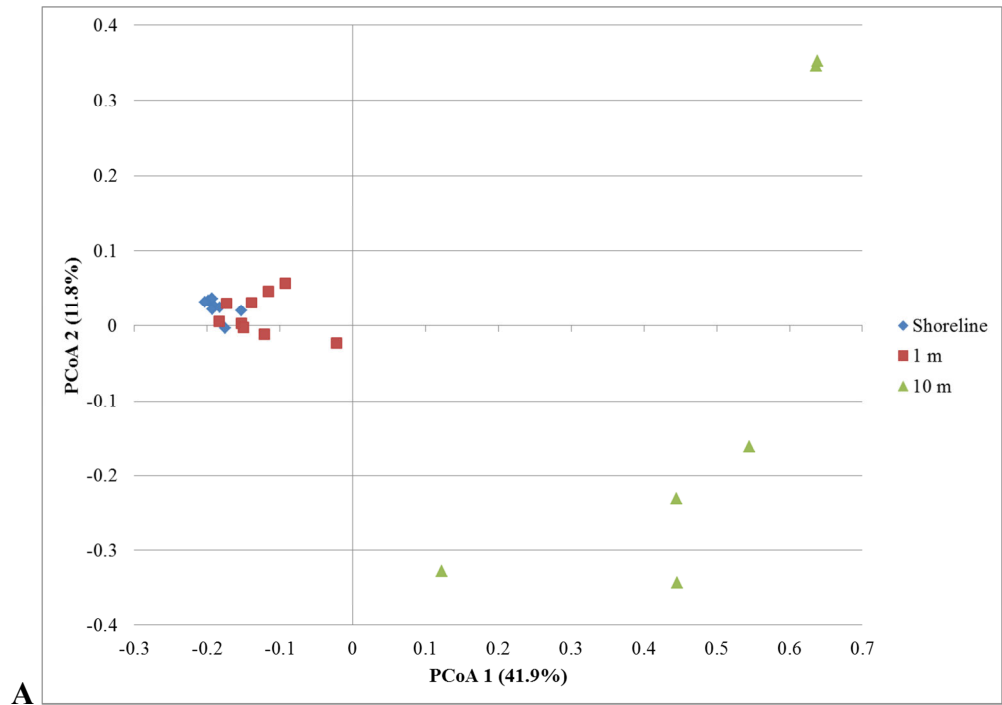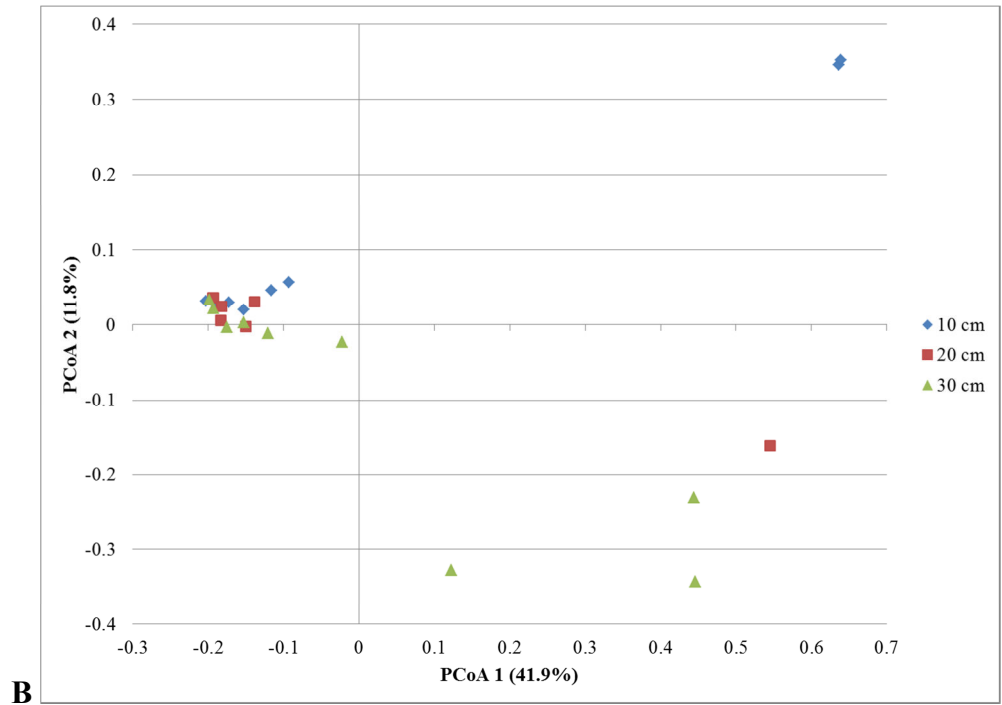

Figure S10 - Principal coordinate analysis of samples collected from Sandy Beach by distance (A) and depth (B). The relationship between the ordination plot and distance matrix:  $r^2 = 0.96$ .

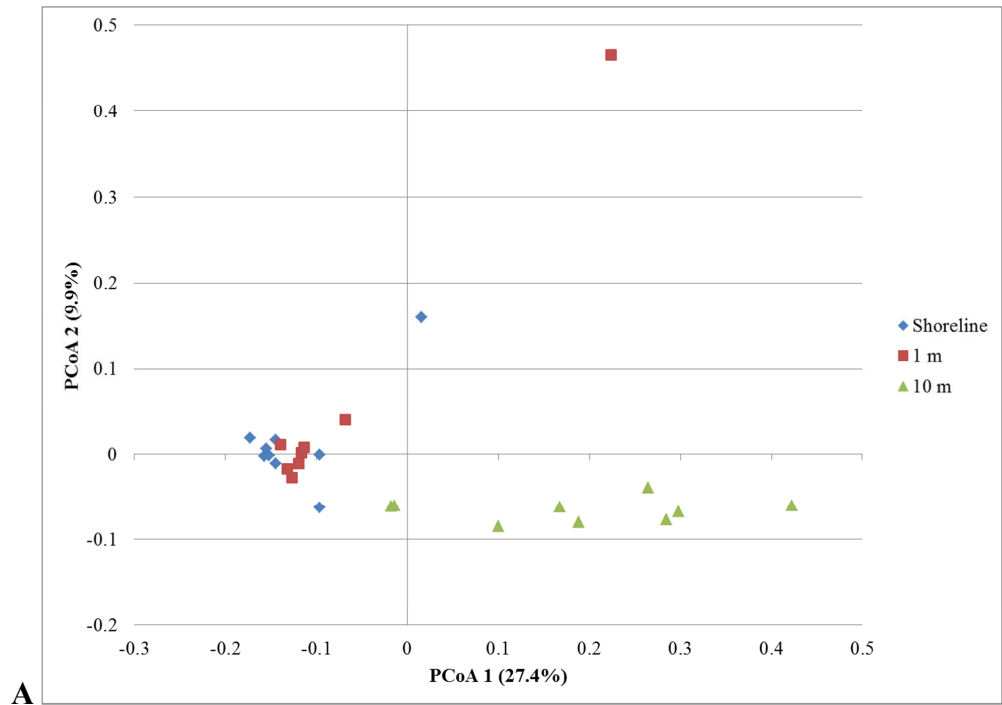

**A**

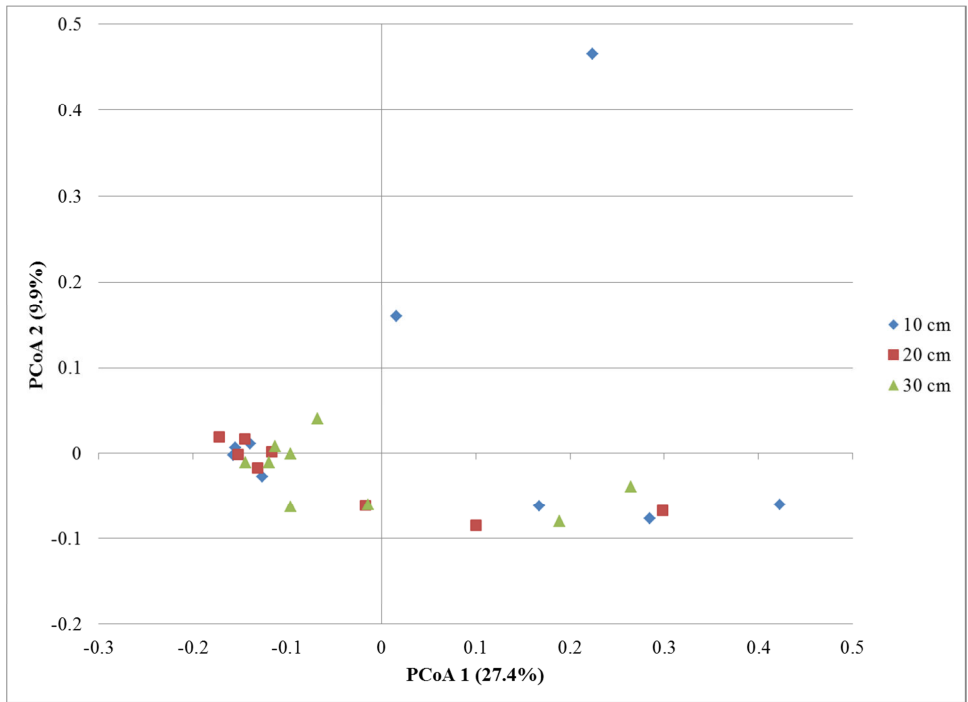

**B**

Figure S11 - Principal coordinate analysis of samples collected from Oturu Dream Beach by distance (A) and depth (B). The relationship between the ordination plot and distance matrix:  $r^2 = 0.89$ .

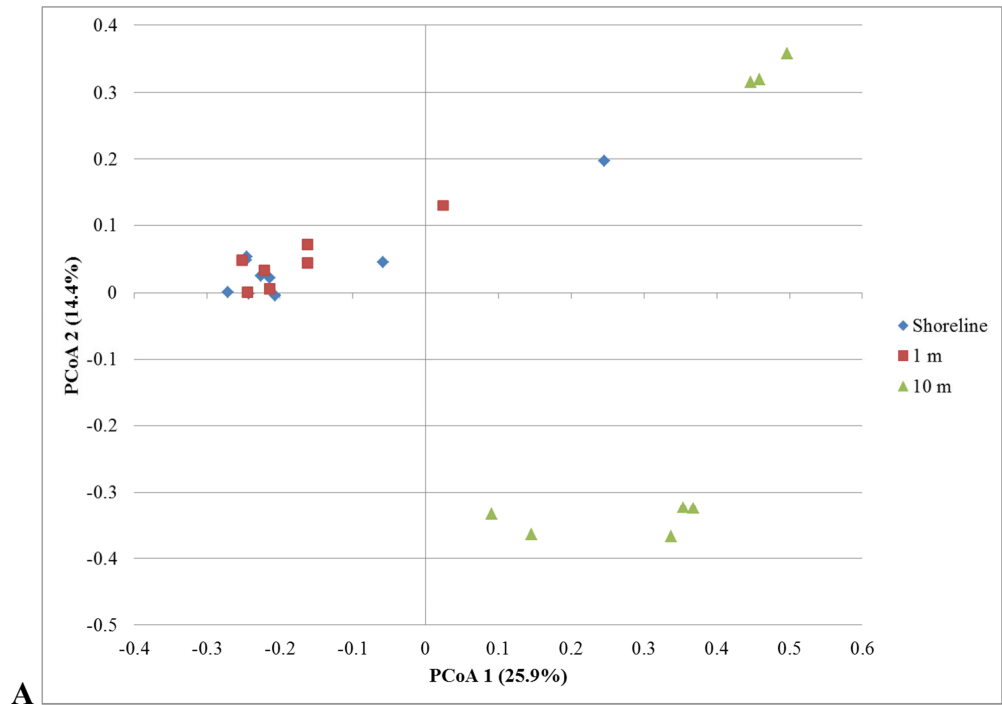

**A**

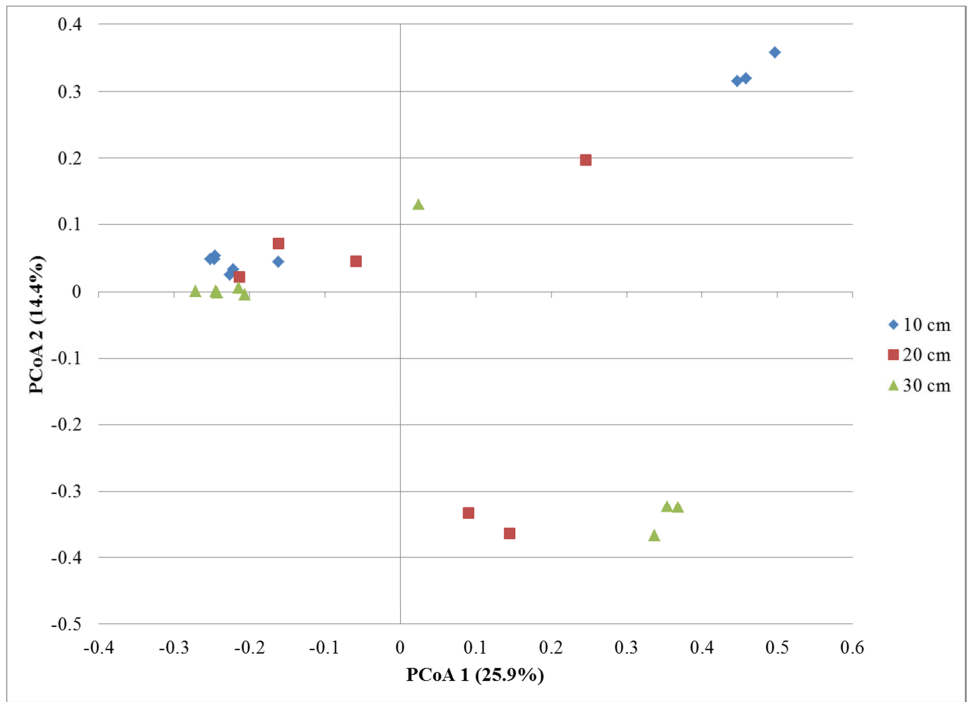

**B**

Figure S12 - Principal coordinate analysis of samples collected from Fukiage-hama Beach by distance (A) and depth (B). The relationship between the ordination plot and distance matrix:  $r^2 = 0.85$ .

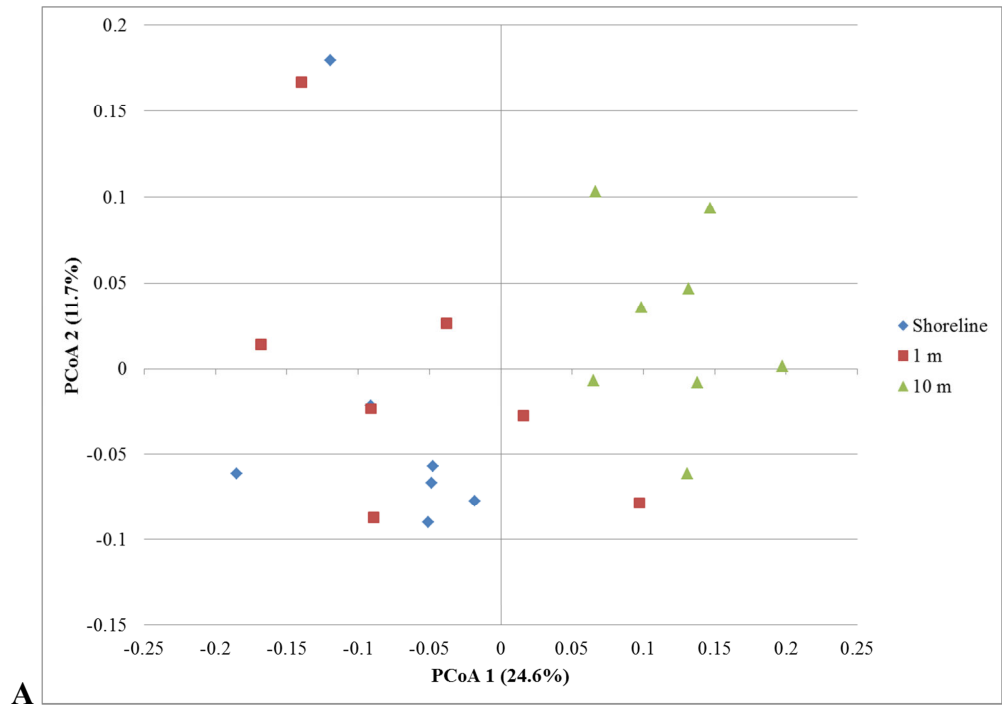

**A**

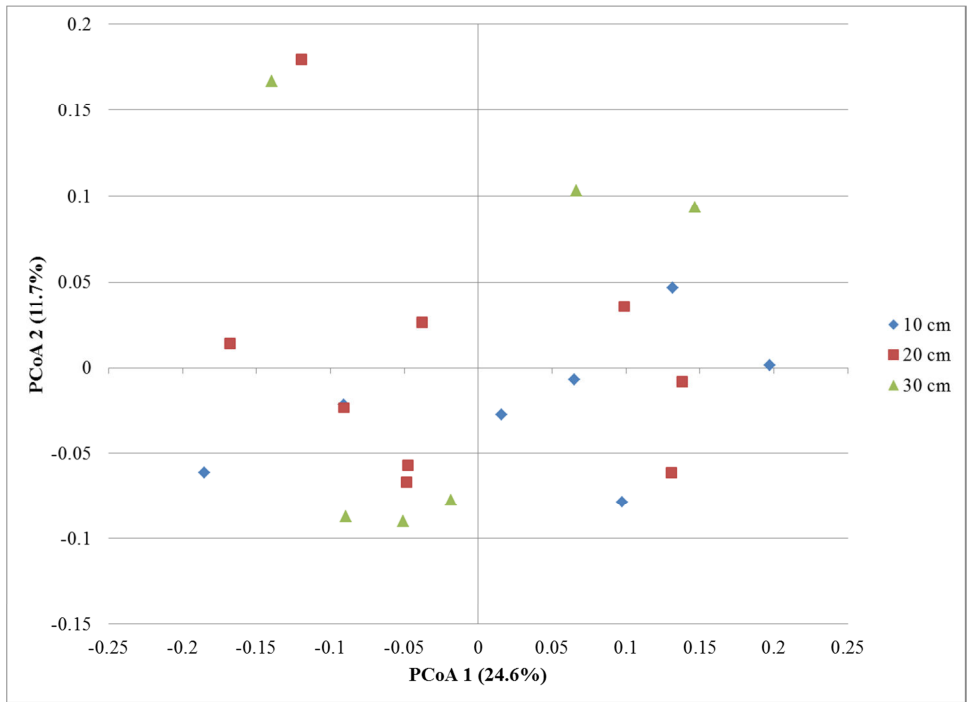

**B**

Figure S13 - Principal coordinate analysis of samples collected from Jeju Beach by distance (A) and depth (B). The relationship between the ordination plot and distance matrix:  $r^2 = 0.90$ .

Table S1 – Shannon (A) and ACE (B) indices (mean  $\pm$  standard deviation) for Great Lakes beaches by transect, distance from shoreline, and depth.

| <b>A</b> | <b>Distance</b>        | <b>Depth</b> | <b>Transect A</b> | <b>Transect B</b> | <b>Transect C</b> |
|----------|------------------------|--------------|-------------------|-------------------|-------------------|
|          |                        | 10cm         | 5.76 $\pm$ 0.09   | 5.73 $\pm$ 0.07   | 5.89 $\pm$ 0.21   |
|          | Shoreline <sup>a</sup> | 20cm         | 5.74 $\pm$ 0.16   | 5.76 $\pm$ 0.20   | 5.92 $\pm$ 0.37   |
|          |                        | 30cm         | 5.87 $\pm$ 0.16   | 5.81 $\pm$ 0.26   | 5.97 $\pm$ 0.39   |
|          |                        | 10cm         | 5.48 $\pm$ 0.31   | 5.57 $\pm$ 0.32   | 5.66 $\pm$ 0.13   |
|          | 1m <sup>a,b</sup>      | 20cm         | 5.68 $\pm$ 0.10   | 5.83 $\pm$ 0.30   | 5.87 $\pm$ 0.24   |
|          |                        | 30cm         | 5.89 $\pm$ 0.19   | 5.75 $\pm$ 0.33   | 5.63 $\pm$ 0.17   |
|          |                        | 10cm         | 5.68 $\pm$ 0.40   | 5.62 $\pm$ 0.36   | 5.30 $\pm$ 0.75   |
|          | 10m <sup>b</sup>       | 20cm         | 5.57 $\pm$ 0.72   | 6.06 $\pm$ 0.31   | 5.49 $\pm$ 0.70   |
|          |                        | 30cm         | 5.54 $\pm$ 0.85   | 5.55 $\pm$ 0.76   | 5.33 $\pm$ 0.57   |

<sup>a,b</sup>Differences in diversity were significant due to distance ( $P = 0.031$ ) and superscripts indicate *post-hoc* significance. Differences due to depth were not significant ( $P = 0.497$ ).

| <b>B</b> | <b>Distance</b> | <b>Depth</b> | <b>Transect A</b> | <b>Transect B</b> | <b>Transect C</b> |
|----------|-----------------|--------------|-------------------|-------------------|-------------------|
|          |                 | 10cm         | 2132 $\pm$ 430    | 2013 $\pm$ 343    | 2497 $\pm$ 698    |
|          | Shoreline       | 20cm         | 2152 $\pm$ 858    | 2498 $\pm$ 1540   | 2401 $\pm$ 1149   |
|          |                 | 30cm         | 2577 $\pm$ 607    | 2141 $\pm$ 549    | 2488 $\pm$ 913    |
|          |                 | 10cm         | 1505 $\pm$ 675    | 1713 $\pm$ 762    | 2364 $\pm$ 202    |
|          | 1m              | 20cm         | 2326 $\pm$ 1253   | 2168 $\pm$ 649    | 2520 $\pm$ 659    |
|          |                 | 30cm         | 2329 $\pm$ 450    | 2162 $\pm$ 658    | 1769 $\pm$ 189    |
|          |                 | 10cm         | 1929 $\pm$ 495    | 2258 $\pm$ 1014   | 2166 $\pm$ 1403   |
|          | 10m             | 20cm         | 1946 $\pm$ 1011   | 2660 $\pm$ 910    | 2123 $\pm$ 907    |
|          |                 | 30cm         | 1873 $\pm$ 1125   | 1848 $\pm$ 764    | 2424 $\pm$ 1470   |

Differences in diversity were not significant due to distance ( $P = 0.436$ ) or depth ( $P = 0.472$ ).

Table S2 – Shannon (A) and ACE (B) indices (mean  $\pm$  standard deviation) for Pacific Ocean beaches by transect, distance from shoreline, and depth.

| <b>A</b> | <b>Distance</b>        | <b>Depth</b> | <b>Transect A</b> | <b>Transect B</b> | <b>Transect C</b> |
|----------|------------------------|--------------|-------------------|-------------------|-------------------|
|          |                        | 10cm         | 6.05 $\pm$ 0.28   | 5.89 $\pm$ 0.33   | 6.14 $\pm$ 0.20   |
|          | Shoreline <sup>a</sup> | 20cm         | 6.03 $\pm$ 0.39   | 5.94 $\pm$ 0.42   | 5.67 $\pm$ 0.99   |
|          |                        | 30cm         | 6.11 $\pm$ 0.35   | 6.01 $\pm$ 0.32   | 6.11 $\pm$ 0.28   |
|          |                        | 10cm         | 6.15 $\pm$ 0.18   | 6.08 $\pm$ 0.10   | 5.58 $\pm$ 0.56   |
|          | 1m <sup>a</sup>        | 20cm         | 6.16 $\pm$ 0.20   | 6.06 $\pm$ 0.23   | 6.35 $\pm$ 0.19   |
|          |                        | 30cm         | 5.96 $\pm$ 0.47   | 6.13 $\pm$ 0.19   | 6.05 $\pm$ 0.21   |
|          |                        | 10cm         | 5.17 $\pm$ 1.25   | 5.36 $\pm$ 1.26   | 5.07 $\pm$ 1.32   |
|          | 10m <sup>b</sup>       | 20cm         | 5.92 $\pm$ 0.30   | 5.98 $\pm$ 0.19   | 6.05 $\pm$ 0.12   |
|          |                        | 30cm         | 6.04 $\pm$ 0.13   | 5.94 $\pm$ 0.35   | 5.80 $\pm$ 0.50   |

<sup>a,b</sup>Differences in diversity were significant due to distance ( $P = 0.010$ ) and superscripts indicate *post-hoc* significance. Differences due to depth were also significant ( $P = 0.042$ ), but *post-hoc* differences were not significant ( $P \geq 0.057$ ).

| <b>B</b> | <b>Distance</b> | <b>Depth</b> | <b>Transect A</b> | <b>Transect B</b> | <b>Transect C</b> |
|----------|-----------------|--------------|-------------------|-------------------|-------------------|
|          |                 | 10cm         | 3817 $\pm$ 2076   | 3530 $\pm$ 2376   | 4660 $\pm$ 2868   |
|          | Shoreline       | 20cm         | 3601 $\pm$ 1587   | 3868 $\pm$ 3353   | 3748 $\pm$ 2366   |
|          |                 | 30cm         | 3564 $\pm$ 2011   | 3812 $\pm$ 2636   | 3366 $\pm$ 1721   |
|          |                 | 10cm         | 4030 $\pm$ 1839   | 3481 $\pm$ 1517   | 1982 $\pm$ 791    |
|          | 1m              | 20cm         | 4161 $\pm$ 2021   | 3677 $\pm$ 1617   | 5139 $\pm$ 1055   |
|          |                 | 30cm         | 3718 $\pm$ 2237   | 2876 $\pm$ 714    | 3031 $\pm$ 1681   |
|          |                 | 10cm         | 2417 $\pm$ 1933   | 2887 $\pm$ 1750   | 2667 $\pm$ 2252   |
|          | 10m             | 20cm         | 3482 $\pm$ 2598   | 3230 $\pm$ 2216   | 4822 $\pm$ 2846   |
|          |                 | 30cm         | 3017 $\pm$ 1649   | 3176 $\pm$ 1970   | 2262 $\pm$ 1087   |

Differences in diversity were not significant due to distance ( $P = 0.218$ ) or depth ( $P = 0.305$ ).



Table S2 – Shannon (A) and ACE (B) indices (mean  $\pm$  standard deviation) for Florida beaches by transect, distance from shoreline, and depth.

| <b>A</b> | <b>Distance</b> | <b>Depth</b> | <b>Transect A</b> | <b>Transect B</b> | <b>Transect C</b> |
|----------|-----------------|--------------|-------------------|-------------------|-------------------|
|          |                 | 10cm         | 6.23 $\pm$ 0.18   | 6.40 $\pm$ 0.21   | 6.37 $\pm$ 0.33   |
|          | Shoreline       | 20cm         | 6.55 $\pm$ 0.03   | 6.51 $\pm$ 0.02   | 6.34 $\pm$ 0.18   |
|          |                 | 30cm         | 6.33 $\pm$ 0.37   | 6.49 $\pm$ 0.22   | 6.35 $\pm$ 0.34   |
|          |                 | 10cm         | 6.35 $\pm$ 0.14   | 6.62 $\pm$ 0.08   | 6.53 $\pm$ 0.04   |
|          | 1m              | 20cm         | 6.52 $\pm$ 0.33   | 6.47 $\pm$ 0.13   | 6.53 $\pm$ 0.02   |
|          |                 | 30cm         | 6.31 $\pm$ 0.06   | 6.34 $\pm$ 0.36   | 6.44 $\pm$ 0.55   |
|          |                 | 10cm         | 6.17 $\pm$ 0.21   | 6.17 $\pm$ 0.05   | 6.27 $\pm$ 0.04   |
|          | 10m             | 20cm         | 6.72 $\pm$ 0.12   | 6.50 $\pm$ 0.26   | 6.54 $\pm$ 0.28   |
|          |                 | 30cm         | 6.70 $\pm$ 0.08   | 6.41 $\pm$ 0.38   | 6.44 $\pm$ 0.44   |

Differences in diversity were not significant due to distance ( $P = 0.730$ ) or depth ( $P = 0.064$ ).

| <b>B</b> | <b>Distance</b>          | <b>Depth</b> | <b>Transect A</b> | <b>Transect B</b> | <b>Transect C</b> |
|----------|--------------------------|--------------|-------------------|-------------------|-------------------|
|          |                          | 10cm         | 5458 $\pm$ 1235   | 5647 $\pm$ 1349   | 6249 $\pm$ 1981   |
|          | Shoreline <sup>a,b</sup> | 20cm         | 7191 $\pm$ 2809   | 5864 $\pm$ 93     | 7656 $\pm$ 1959   |
|          |                          | 30cm         | 5375 $\pm$ 637    | 7006 $\pm$ 3248   | 6163 $\pm$ 3676   |
|          |                          | 10cm         | 4543 $\pm$ 1632   | 7015 $\pm$ 1134   | 5787 $\pm$ 3727   |
|          | 1m <sup>a</sup>          | 20cm         | 5418 $\pm$ 3506   | 7356 $\pm$ 1694   | 7562 $\pm$ 1803   |
|          |                          | 30cm         | 5664 $\pm$ 1903   | 7116 $\pm$ 4124   | 8707 $\pm$ 5743   |
|          |                          | 10cm         | 5727 $\pm$ 4056   | 3131 $\pm$ 1328   | 5583 $\pm$ 358    |
|          | 10m <sup>b</sup>         | 20cm         | 4458 $\pm$ 559    | 4573 $\pm$ 2067   | 3913 $\pm$ 382    |
|          |                          | 30cm         | 6511 $\pm$ 4163   | 4813 $\pm$ 1513   | 4962 $\pm$ 772    |

<sup>a,b</sup>Differences in diversity were significant due to distance ( $P = 0.041$ ) and superscripts indicate *post-hoc* significance. Differences due to depth were not significant ( $P = 0.555$ ).
